# Supplementary material
Source: publisher figshare collection journal article supplement (https://karger.figshare.com/articles/dataset/_/3465473)

**Figure S1**

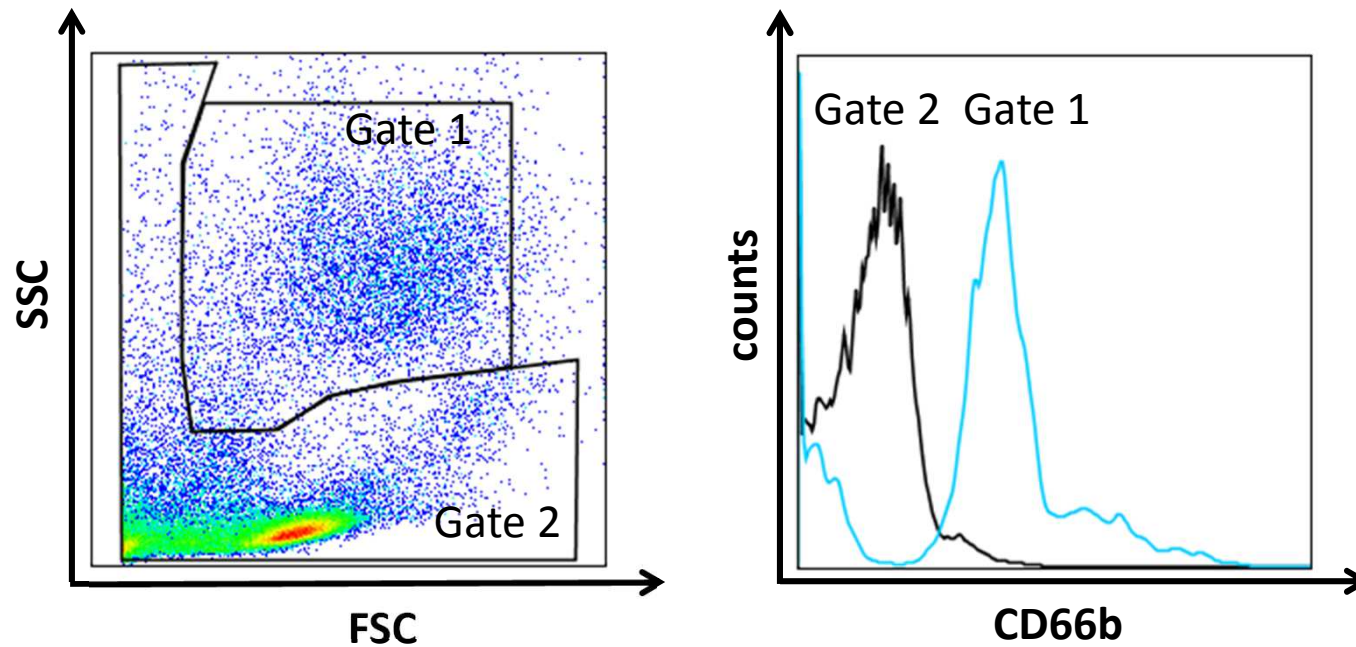

**CD66b expression in cells from the PBMC fraction:**

The PBMC fraction was prepared from heparinized blood samples by Ficoll density gradient sedimentation. In CAPS patients, FACS forward side scatter revealed an  $FSC^{high}SSC^{high}$  “granulocytic” population (Gate 1). Only cells out of Gate 1 were CD66b positive.

**Figure S2**

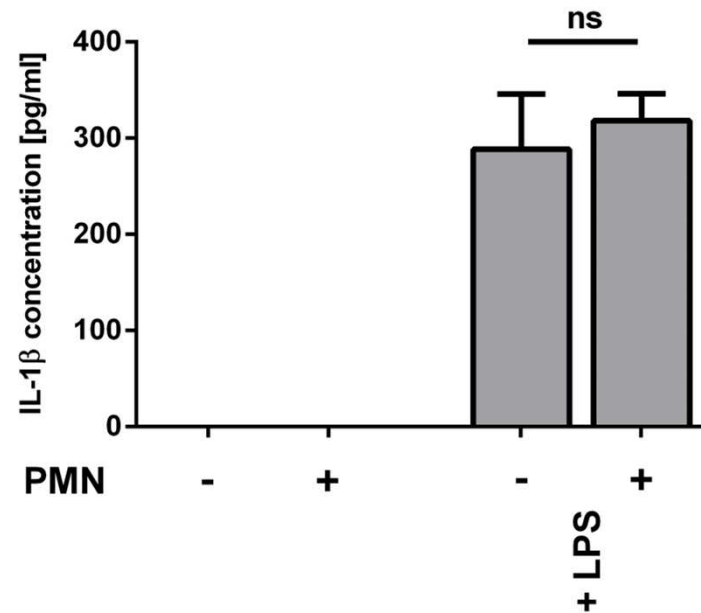

**Conventional PMNs do not decrease IL-1β secretion from CAPS monocytes:**

Conventional “high-density” PMNs (CD66b<sup>+</sup>) and monocytes (CD14<sup>+</sup>) were MACS-isolated from heparinized blood of CAPS patients and cocultured with or without LPS (10 ng/ml) in complete medium at 37°C, 5% CO<sub>2</sub>. After 4 hours of incubation, supernatants were analyzed for IL-1β-levels with ELISA. Data are shown as means ± SEMs analyzed by a paired t-test.

**Figure S3**

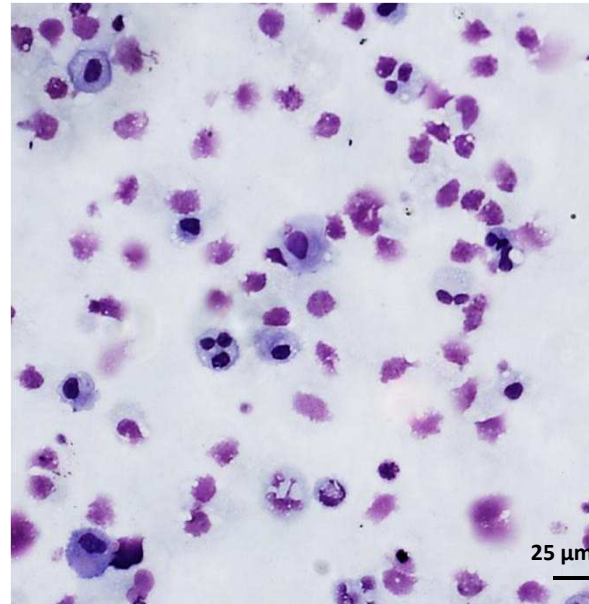

**IL-1 $\beta$  MDSCs**  
*in vitro*

**Cytospins of *in vitro* IL-1 $\beta$ -induced MDSCs:**

MDSCs were induced by incubating PBMCs ( $5 \times 10^5/\text{ml}$ ) with complete medium and 1 ng/ml IL-1 $\beta$ . CD33 $^+$  were MACS-isolated and cytopins were stained with May–Gruenwald–Giemsa.

**Figure S4**

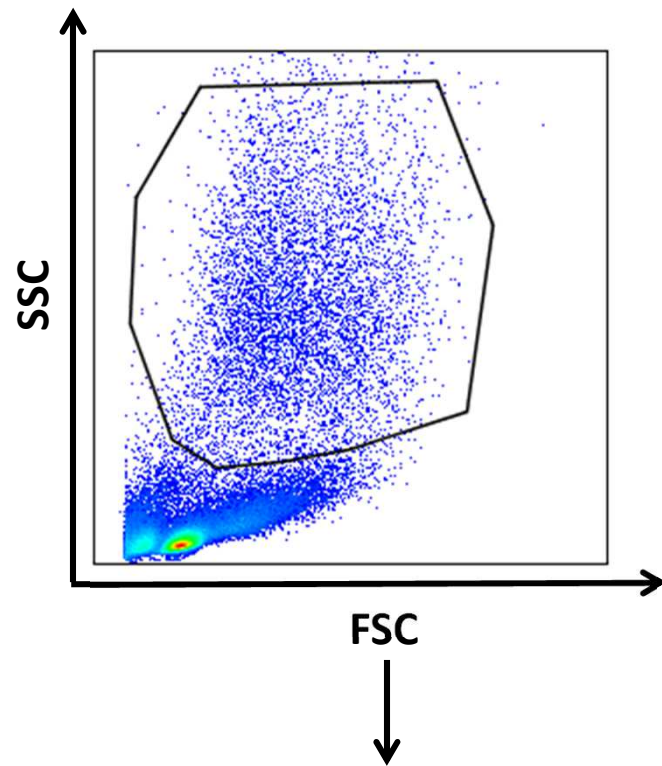

**Surface marker staining of *in vitro* IL-1 $\beta$ -induced MDSCs:** MDSCs were induced by incubating PBMCs ( $5 \times 10^5/\text{ml}$ ) with complete medium and 1 ng/ml IL-1 $\beta$ . Histograms show surface marker staining. MDSCs were determined as SSC<sup>high</sup>CD33<sup>+</sup>CD14<sup>-</sup> cells.

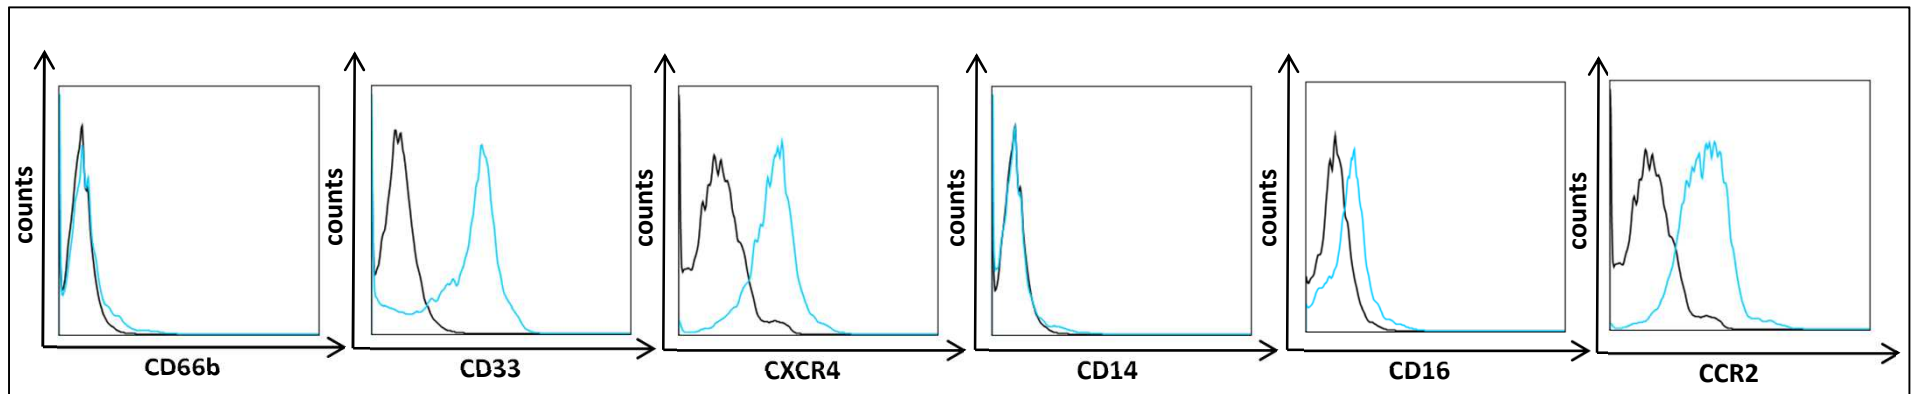

Supplement: Supplementary file 1 [file 1]
